# Supplementary material for: Subtype-specific profiles and predictive factors for early evaluation of vitamin D levels in newly diagnosed active juvenile idiopathic arthritis
Source: Research Square preprint supplement (doi:10.21203/rs.3.rs-5659951/v1), 2025-05-06
Supplement: Supplementary file 1 [file 088ece44a98d597ed22a19f5.xlsx]

## Sheet: Sheet1
Table 1. General information of 236 patients
Variables	Overall
	(n = 236)
Age, mean (SD), months	108.87 ± 49.37
MinNation, n (%)
Han	206 (87.29%)
Others	30 (12.71%)
Gender, n (%)
Female	103 (43.64%)
Male	133 (56.36%)
Height, mean (SD), cm (n=139)	133.91 ± 25.90
Weight, mean (SD), kg	31.51 ± 15.93
Weight_3f, n (%) (n=235)
Normal	199 (84.68%)
Below normal	22 (9.36%)
Above normal	14 (5.96%)
BMI, mean (SD), kg/m2 (n=138)	17.30 ± 3.87
BSA, mean (SD), m2	1.05 (0.36)
Season, n (%)
Spring	79 (33.47%)
Summer	71 (30.08%)
Autumn	40 (16.95%)
Winter	46 (19.49%)
SD, standard deviation; kg, kilogram; 3f means three classification of body weight.
