# Supplementary material for: Subtype-specific profiles and predictive factors for early evaluation of vitamin D levels in newly diagnosed active juvenile idiopathic arthritis
Source: Research Square preprint supplement (doi:10.21203/rs.3.rs-5659951/v1), 2025-05-06
Supplement: Supplementary file 2 [file 89d8251032997d0e11bee61e.xlsx]

## Sheet: Sheet
Supplementary Table 1. General and clinical information of JIA subtypes
Variables	Overall (n = 236)	Systemic JIA (n = 18)	Oligoarticular JIA (n = 26)	Rheumatoid factor-negative JIA (n = 41)	Rheumatoid factor-positive JIA (n = 24)	Enthesitis-related arthritis (n = 65)	Undifferentiated JIA (n = 62)
Age, mean (SD), months	3,266 ± 1,481	2,827 ± 1,279	2,109 ± 1,383	3,316 ± 1,445	3,525 ± 1,288	4,266 ± 986	2,697 ± 1,464
Gender, n (%)
Female	103 (43.64%)	5 (27.78%)	17 (65.38%)	20 (48.78%)	19 (79.17%)	8 (12.31%)	34 (54.84%)
Male	133 (56.36%)	13 (72.22%)	9 (34.62%)	21 (51.22%)	5 (20.83%)	57 (87.69%)	28 (45.16%)
MinNation, n (%)
Han	206 (87.29%)	15 (83.33%)	23 (88.46%)	39 (95.12%)	19 (79.17%)	59 (90.77%)	51 (82.26%)
Others	30 (12.71%)	3 (16.67%)	3 (11.54%)	2 (4.88%)	5 (20.83%)	6 (9.23%)	11 (17.74%)
Season, n (%)
Spring	79 (33.47%)	5 (27.78%)	10 (38.46%)	19 (46.34%)	8 (33.33%)	20 (30.77%)	17 (27.42%)
Summer	71 (30.08%)	8 (44.44%)	10 (38.46%)	9 (21.95%)	10 (41.67%)	19 (29.23%)	15 (24.19%)
Autumn	40 (16.95%)	1 (5.56%)	2 (7.69%)	5 (12.20%)	2 (8.33%)	13 (20.00%)	17 (27.42%)
Winter	46 (19.49%)	4 (22.22%)	4 (15.38%)	8 (19.51%)	4 (16.67%)	13 (20.00%)	13 (20.97%)
Diagnose, n (%)
Systemic JIA	18 (7.63%)	18 (100.00%)	0 (0.00%)	0 (0.00%)	0 (0.00%)	0 (0.00%)	0 (0.00%)
Oligoarticular JIA	15 (6.36%)	0 (0.00%)	15 (57.69%)	0 (0.00%)	0 (0.00%)	0 (0.00%)	0 (0.00%)
Rheumatoid factor-negative JIA	34 (14.41%)	0 (0.00%)	0 (0.00%)	34 (82.93%)	0 (0.00%)	0 (0.00%)	0 (0.00%)
Rheumatoid factor-positive JIA	18 (7.63%)	0 (0.00%)	0 (0.00%)	0 (0.00%)	18 (75.00%)	0 (0.00%)	0 (0.00%)
Enthesitis-related arthritis	59 (25.00%)	0 (0.00%)	0 (0.00%)	0 (0.00%)	0 (0.00%)	59 (90.77%)	0 (0.00%)
Undifferentiated JIA	92 (38.98%)	0 (0.00%)	11 (42.31%)	7 (17.07%)	6 (25.00%)	6 (9.23%)	62 (100.00%)
Initial diagnose, n (%)
Systemic JIA	18 (7.63%)	18 (100.00%)	0 (0.00%)	0 (0.00%)	0 (0.00%)	0 (0.00%)	0 (0.00%)
Oligoarticular JIA	15 (6.36%)	0 (0.00%)	15 (57.69%)	0 (0.00%)	0 (0.00%)	0 (0.00%)	0 (0.00%)
Rheumatoid factor-negative JIA	34 (14.41%)	0 (0.00%)	0 (0.00%)	34 (82.93%)	0 (0.00%)	0 (0.00%)	0 (0.00%)
Rheumatoid factor-positive JIA	18 (7.63%)	0 (0.00%)	0 (0.00%)	0 (0.00%)	18 (75.00%)	0 (0.00%)	0 (0.00%)
Enthesitis-related arthritis	59 (25.00%)	0 (0.00%)	0 (0.00%)	0 (0.00%)	0 (0.00%)	59 (90.77%)	0 (0.00%)
Undifferentiated JIA	92 (38.98%)	0 (0.00%)	11 (42.31%)	7 (17.07%)	6 (25.00%)	6 (9.23%)	62 (100.00%)
Height, mean (SD), cm (n=139)	133.91 ± 25.90	126.46 ± 25.50	121.59 ± 28.58	135.17 ± 24.90	130.57 ± 23.44	149.00 ± 17.49	126.56 ± 27.86
Weight, mean (SD), Kg (n=235)	31.51 ± 15.93	28.00 ± 17.65	24.83 ± 17.59	31.10 ± 14.63	30.69 ± 13.80	39.49 ± 13.98	27.49 ± 15.48
Weight_3f, n (%) (n=235)
Normal	199 (84.68%)	16 (88.89%)	20 (76.92%)	39 (95.12%)	19 (79.17%)	54 (83.08%)	51 (83.61%)
Below normal	22 (9.36%)	1 (5.56%)	1 (3.85%)	2 (4.88%)	5 (20.83%)	7 (10.77%)	6 (9.84%)
Above normal	14 (5.96%)	1 (5.56%)	5 (19.23%)	0 (0.00%)	0 (0.00%)	4 (6.15%)	4 (6.56%)
Weight_5f, n (%) (n=235)
Middle class	94 (40.00%)	10 (55.56%)	13 (50.00%)	20 (48.78%)	12 (50.00%)	18 (27.69%)	21 (34.43%)
Lower class	22 (9.36%)	1 (5.56%)	1 (3.85%)	2 (4.88%)	5 (20.83%)	7 (10.77%)	6 (9.84%)
Lower-middle class	67 (28.51%)	5 (27.78%)	5 (19.23%)	12 (29.27%)	5 (20.83%)	23 (35.38%)	17 (27.87%)
Upper-middle class	38 (16.17%)	1 (5.56%)	2 (7.69%)	7 (17.07%)	2 (8.33%)	13 (20.00%)	13 (21.31%)
Upper class	14 (5.96%)	1 (5.56%)	5 (19.23%)	0 (0.00%)	0 (0.00%)	4 (6.15%)	4 (6.56%)
Weight_9f, n (%) (n=235)
P50	11 (4.68%)	1 (5.56%)	2 (7.69%)	1 (2.44%)	2 (8.33%)	3 (4.62%)	2 (3.28%)
< P3	22 (9.36%)	1 (5.56%)	1 (3.85%)	2 (4.88%)	5 (20.83%)	7 (10.77%)	6 (9.84%)
P3-P10	29 (12.34%)	3 (16.67%)	1 (3.85%)	4 (9.76%)	3 (12.50%)	11 (16.92%)	7 (11.48%)
P10-P25	38 (16.17%)	2 (11.11%)	4 (15.38%)	8 (19.51%)	2 (8.33%)	12 (18.46%)	10 (16.39%)
P25-P50	46 (19.57%)	6 (33.33%)	6 (23.08%)	10 (24.39%)	5 (20.83%)	11 (16.92%)	8 (13.11%)
P50-P75	37 (15.74%)	3 (16.67%)	5 (19.23%)	9 (21.95%)	5 (20.83%)	4 (6.15%)	11 (18.03%)
P75-P90	28 (11.91%)	1 (5.56%)	1 (3.85%)	5 (12.20%)	1 (4.17%)	11 (16.92%)	9 (14.75%)
P90-P97	10 (4.26%)	0 (0.00%)	1 (3.85%)	2 (4.88%)	1 (4.17%)	2 (3.08%)	4 (6.56%)
> P97	14 (5.96%)	1 (5.56%)	5 (19.23%)	0 (0.00%)	0 (0.00%)	4 (6.15%)	4 (6.56%)
BMI, mean (SD), kg/m2 (n=138)	17.30 ± 3.87	16.63 ± 5.87	17.96 ± 4.38	17.04 ± 2.80	15.91 ± 2.50	17.76 ± 3.90	17.46 ± 3.81
BSA, mean (SD), m2	1.05 ± 0.36	0.96 ± 0.39	0.87 ± 0.41	1.05 ± 0.34	1.05 ± 0.31	1.24 ± 0.28	0.94 ± 0.37
Vitamin D level, mean (SD), ng/ml	21.23 ± 9.09	17.53 ± 7.05	23.69 ± 10.44	22.23 ± 9.33	18.23 ± 6.51	18.70 ± 8.38	24.42 ± 9.23
Vitamin D level_4f, n (%)
Normal level	37 (15.68%)	0 (0.00%)	8 (30.77%)	8 (19.51%)	1 (4.17%)	7 (10.77%)	13 (20.97%)
Insufficiency level	83 (35.17%)	10 (55.56%)	7 (26.92%)	12 (29.27%)	8 (33.33%)	17 (26.15%)	29 (46.77%)
Deficiency level	98 (41.53%)	5 (27.78%)	9 (34.62%)	20 (48.78%)	14 (58.33%)	31 (47.69%)	19 (30.65%)
Severe deficiency level	18 (7.63%)	3 (16.67%)	2 (7.69%)	1 (2.44%)	1 (4.17%)	10 (15.38%)	1 (1.61%)
Vitamin D level_2f, n (%)
Normal	120 (50.85%)	10 (55.56%)	15 (57.69%)	20 (48.78%)	9 (37.50%)	24 (36.92%)	42 (67.74%)
Deficiency	116 (49.15%)	8 (44.44%)	11 (42.31%)	21 (51.22%)	15 (62.50%)	41 (63.08%)	20 (32.26%)
RF, mean (SD), IU/ml (n=92)	92.91 ± 183.58	20.46 ± 0.79	20.41 ± 0.76	20.57 ± 1.56	298.36 ± 271.56	20.26 ± 0.70	20.42 ± 1.46
RF, n (%)
Negative	212 (89.83%)	18 (100.00%)	26 (100.00%)	41 (100.00%)	0 (0.00%)	65 (100.00%)	62 (100.00%)
Positive	24 (10.17%)	0 (0.00%)	0 (0.00%)	0 (0.00%)	24 (100.00%)	0 (0.00%)	0 (0.00%)
Anti-CCP, n (%) (n=235)
Negative	216 (91.91%)	18 (100.00%)	26 (100.00%)	41 (100.00%)	7 (29.17%)	65 (100.00%)	59 (96.72%)
Positive	19 (8.09%)	0 (0.00%)	0 (0.00%)	0 (0.00%)	17 (70.83%)	0 (0.00%)	2 (3.28%)
ANA, n (%) (n=232)
Negative	179 (77.16%)	15 (88.24%)	15 (57.69%)	31 (79.49%)	15 (62.50%)	55 (85.94%)	48 (77.42%)
Positive	53 (22.84%)	2 (11.76%)	11 (42.31%)	8 (20.51%)	9 (37.50%)	9 (14.06%)	14 (22.58%)
ESR, mean (SD), mm/1hr (n=232)	36.57 ± 31.92	85.61 ± 27.91	21.54 ± 15.22	31.08 ± 32.28	40.17 ± 27.54	39.95 ± 29.83	27.00 ± 27.69
CRP, mean (SD), mg/L (n=235)	23.91 ± 30.10	66.77 ± 51.32	8.88 ± 9.11	19.10 ± 21.96	22.69 ± 17.86	19.02 ± 23.34	19.32 ± 23.17
Normalized ESR, mean (SD), mm/1hr (n=226)	2.11 ± 2.78	6.46 ± 2.62	0.59 ± 1.13	1.76 ± 2.74	2.24 ± 2.52	2.30 ± 2.62	1.39 ± 2.31
Normalized CRP, mean (SD), mg/L (n=235)	1.07 ± 2.20	4.97 ± 3.31	0.14 ± 0.52	0.79 ± 1.80	1.23 ± 1.61	0.85 ± 1.99	0.67 ± 1.75
IL-10, n (%) (n=204)
Normal	188 (92.16%)	10 (71.43%)	23 (100.00%)	34 (97.14%)	13 (76.47%)	55 (93.22%)	53 (94.64%)
Increase	16 (7.84%)	4 (28.57%)	0 (0.00%)	1 (2.86%)	4 (23.53%)	4 (6.78%)	3 (5.36%)
IL-10, mean (SD), pg/ml (n=204)	2.34 ± 3.05	3.67 ± 2.96	1.64 ± 1.31	1.75 ± 1.40	4.63 ± 7.02	2.14 ± 3.09	2.17 ± 1.85
TNF-α, n (%) (n=207)
Normal	171 (82.61%)	13 (86.67%)	20 (83.33%)	28 (75.68%)	11 (64.71%)	48 (82.76%)	51 (91.07%)
Increase	36 (17.39%)	2 (13.33%)	4 (16.67%)	9 (24.32%)	6 (35.29%)	10 (17.24%)	5 (8.93%)
TNF-α, mean (SD) (n=207)	5.44 ± 15.82	1.79 ± 3.94	8.23 ± 19.67	3.05 ± 4.98	13.82 ± 28.88	5.98 ± 16.35	3.68 ± 14.13
IL-1β, n (%) (n=80)
Normal	77 (96.25%)	6 (100.00%)	6 (100.00%)	13 (100.00%)	5 (83.33%)	22 (95.65%)	25 (96.15%)
Increase	3 (3.75%)	0 (0.00%)	0 (0.00%)	0 (0.00%)	1 (16.67%)	1 (4.35%)	1 (3.85%)
IL-1β, mean (SD), pg/ml (n=80)	3.64 ± 8.28	1.21 ± 1.00	3.15 ± 3.64	2.67 ± 3.10	10.20 ± 15.96	3.20 ± 5.60	3.69 ± 10.87
IFN-γ, n (%) (n=209)
Normal	206 (98.56%)	15 (100.00%)	22 (100.00%)	37 (97.37%)	20 (100.00%)	54 (96.43%)	58 (100.00%)
Increase	3 (1.44%)	0 (0.00%)	0 (0.00%)	1 (2.63%)	0 (0.00%)	2 (3.57%)	0 (0.00%)
IFN-γ, mean (SD), pg/ml (n=209)	1.34 ± 4.39	1.70 ± 3.23	0.88 ± 2.18	1.52 ± 6.52	0.83 ± 2.37	1.93 ± 5.64	0.92 ± 2.23
IL-6, n (%) (n=204)
Normal	131 (64.22%)	2 (13.33%)	19 (86.36%)	23 (67.65%)	7 (38.89%)	37 (61.67%)	43 (78.18%)
Increase	73 (35.78%)	13 (86.67%)	3 (13.64%)	11 (32.35%)	11 (61.11%)	23 (38.33%)	12 (21.82%)
IL-6, mean (SD), pg/ml (n=204)	69.07 ± 288.24	129.93 ± 318.42	226.76 ± 711.85	82.57 ± 316.14	60.45 ± 80.33	41.77 ± 95.47	13.67 ± 25.85
IL-17A, n (%) (n=212)
Normal	204 (96.23%)	14 (93.33%)	23 (100.00%)	36 (97.30%)	19 (100.00%)	56 (91.80%)	56 (98.25%)
Increase	8 (3.77%)	1 (6.67%)	0 (0.00%)	1 (2.70%)	0 (0.00%)	5 (8.20%)	1 (1.75%)
IL-17A, mean (SD), pg/ml (n=212)	3.51 ± 15.75	2.96 ± 4.93	1.21 ± 2.55	7.48 ± 35.70	1.82 ± 2.87	4.29 ± 8.40	1.72 ± 3.32
IL-8, n (%) (n=73)
Normal	71 (97.26%)	4 (100.00%)	4 (100.00%)	14 (100.00%)	5 (83.33%)	20 (95.24%)	24 (100.00%)
Increase	2 (2.74%)	0 (0.00%)	0 (0.00%)	0 (0.00%)	1 (16.67%)	1 (4.76%)	0 (0.00%)
IL-8, mean (SD), pg/ml (n=73)	6.79 ± 6.38	9.45 ± 8.59	5.35 ± 4.75	6.58 ± 4.86	9.53 ± 9.76	7.59 ± 7.71	5.32 ± 4.78
IL-4, n (%) (n=217)
Normal	208 (95.85%)	15 (100.00%)	24 (100.00%)	37 (97.37%)	16 (80.00%)	58 (95.08%)	58 (98.31%)
Increase	9 (4.15%)	0 (0.00%)	0 (0.00%)	1 (2.63%)	4 (20.00%)	3 (4.92%)	1 (1.69%)
IL-4, mean (SD), pg/ml (n=217)	1.38 ± 8.34	0.44 ± 0.63	0.34 ± 0.58	0.60 ± 1.01	3.64 ± 9.56	0.87 ± 1.81	2.32 ± 14.87
IL-2, n (%) (n=218)
Normal	212 (97.25%)	14 (93.33%)	24 (100.00%)	39 (100.00%)	17 (85.00%)	60 (98.36%)	58 (98.31%)
Increase	6 (2.75%)	1 (6.67%)	0 (0.00%)	0 (0.00%)	3 (15.00%)	1 (1.64%)	1 (1.69%)
IL-2, mean (SD), pg/ml (n=218)	1.59 ± 6.64	1.24 ± 3.49	0.59 ± 1.25	0.70 ± 1.39	6.11 ± 12.68	1.00 ± 2.66	1.77 ± 9.58
Ca, n (%) (n=232)
Normal	226 (97.41%)	17 (94.44%)	24 (92.31%)	39 (97.50%)	24 (100.00%)	63 (98.44%)	59 (98.33%)
Increase	5 (2.16%)	0 (0.00%)	2 (7.69%)	1 (2.50%)	0 (0.00%)	1 (1.56%)	1 (1.67%)
Decrease	1 (0.43%)	1 (5.56%)	0 (0.00%)	0 (0.00%)	0 (0.00%)	0 (0.00%)	0 (0.00%)
Ca, mean (SD), mmol/L (n=232)	2.41 ± 0.16	2.29 ± 0.14	2.48 ± 0.14	2.41 ± 0.14	2.39 ± 0.11	2.42 ± 0.19	2.42 ± 0.15
P, n (%) (n=232)
Normal	231 (99.57%)	18 (100.00%)	26 (100.00%)	40 (100.00%)	24 (100.00%)	63 (98.44%)	60 (100.00%)
Decrease	1 (0.43%)	0 (0.00%)	0 (0.00%)	0 (0.00%)	0 (0.00%)	1 (1.56%)	0 (0.00%)
P, mean (SD), mmol/L (n=232)	1.63 ± 0.24	1.59 ± 0.29	1.65 ± 0.24	1.64 ± 0.25	1.55 ± 0.18	1.63 ± 0.26	1.68 ± 0.22
ALP, n (%) (n=232)
Normal	208 (89.66%)	12 (66.67%)	25 (96.15%)	37 (92.50%)	22 (91.67%)	57 (89.06%)	55 (91.67%)
Decrease	24 (10.34%)	6 (33.33%)	1 (3.85%)	3 (7.50%)	2 (8.33%)	7 (10.94%)	5 (8.33%)
ALP, mean (SD), U/L (n=232)	192.73 ± 68.17	148.56 ± 37.02	197.25 ± 52.77	205.60 ± 87.25	166.25 ± 45.45	200.06 ± 78.37	198.21 ± 55.97
BMD, n (%)
Normal	167 (70.76%)	13 (72.22%)	22 (84.62%)	32 (78.05%)	19 (79.17%)	35 (53.85%)	46 (74.19%)
Decrease	69 (29.24%)	5 (27.78%)	4 (15.38%)	9 (21.95%)	5 (20.83%)	30 (46.15%)	16 (25.81%)
SD, standard deviation; JIA, juvenile idiopathic arthritis; kg, kilogram; RF, rheumatoid factor; anti-CCP, anti-cyclic citrullinated antibodies; ANA, anti-nuclear antibody; ESR, erythrocyte sedimentation rate; CRP, C-reactive protein; IL, interleukin; Ca, calcium; P, phosphorus; ALP, alkaline phosphatase; BSA, body surface area; BMD, bone mineral density. 3f means three classifications of body we…
