# Supplementary material for: Subtype-specific profiles and predictive factors for early evaluation of vitamin D levels in newly diagnosed active juvenile idiopathic arthritis
Source: Research Square preprint supplement (doi:10.21203/rs.3.rs-5659951/v1), 2025-05-06
Supplement: Supplementary file 3 [file afaac20f29821a35e115a6fa.xlsx]

## Sheet: Sheet1
Table 2. Clinical information of 236 patients
Variables	Overall
	(n = 236)
Diagnose, n (%)
Systemic JIA	24 (10.17%)
Oligoarticular JIA	26 (11.02%)
Rheumatoid factor-positive JIA	18 (7.63%)
Rheumatoid factor-negative JIA	41 (17.37%)
Enthesitis-related arthritis	65 (27.54%)
Undifferentiated JIA	62 (26.27%)
Vitamin D level, mean (SD), ng/mL	21.23 ± 9.09
Vitamin D level classification, n (%)
Normal	37 (15.68%)
Insufficiency	83 (35.17%)
Deficiency	98 (41.53%)
Severe deficiency	18 (7.63%)
RF, n (%)
Negative	212 (89.83%)
Positive	24 (10.17%)
Anti-CCP, n (%) (n=235)
Negative	216 (91.91%)
Positive	19 (8.09%)
ANA, n (%) (n=232)
Negative	179 (77.16%)
Positive	53 (22.84%)
Normalized ESR, mean (SD), mm/1hr (n=226)	2.11 ± 2.78
Normalized CRP, mean (SD), mg/L (n=235)	1.07 ± 2.20
IL6, mean (SD), pg/ml	69.07 ± 288.24
Ca, mean (SD), pg/ml	2.41 ± 0.16
P, mean (SD), mmol/L	1.63 ± 0.24
ALP, mean (SD), mmol/L	192.73 ± 68.17
BMD, n (%)
Normal	167 (70.76%)
Decrease	69 (29.24%)
SD, standard deviation; JIA, juvenile idiopathic arthritis; RF, rheumatoid factor; anti-CCP, anti-cyclic citrullinated antibodies; ANA, anti-nuclear antibody; ESR, erythrocyte sedimentation rate; CRP, C-reactive protein; IL-6, interleukin 6; Ca, calcium; P, phosphorus; ALP, alkaline phosphatase; BMD, bone mineral density.
