# Supplementary material for: Subtype-specific profiles and predictive factors for early evaluation of vitamin D levels in newly diagnosed active juvenile idiopathic arthritis
Source: Research Square preprint supplement (doi:10.21203/rs.3.rs-5659951/v1), 2025-05-06
Supplement: Supplementary file 4 [file d78df6aa093566d0183539bb.xlsx]

## Sheet: Sheet1
Supplementary Table 3. Univariable analysis
Variables	Estimate beta (95% CI)	p value	OR	lower	upper
RF, IU/ml	-0.00 (-0.00,0.00)	0.681	0	0	0
ANA
Positive vs Negative	0.17 (-0.13,0.47)	0.259	0.17	-0.13	0.47
IL-10, pg/ml	0.01 (-0.03,0.05)	0.531	0.01	-0.03	0.05
TNF-α, pg/ml	-0.01 (-0.02,0.00)	0.205	-0.01	-0.02	0
IL-1β, pg/ml	-0.01 (-0.03,0.02)	0.68	-0.01	-0.03	0.02
IFN-γ, pg/ml	-0.01 (-0.04,0.02)	0.713	-0.01	-0.04	0.02
IL-6, pg/ml	-0.00 (-0.00,0.00)	0.155	0	0	0
IL-17A, pg/ml	-0.00 (-0.01,0.01)	0.612	0	-0.01	0.01
IL-8, pg/ml	-0.01 (-0.04,0.02)	0.657	-0.01	-0.04	0.02
IL-4, pg/ml	-0.00 (-0.02,0.01)	0.84	0	-0.02	0.01
IL-2, pg/ml	0.00 (-0.02,0.02)	0.999	0	-0.02	0.02
Ca, mmol/L	0.77 (0.00,1.49)*	0.04	0.77	0	1.49
P, mmol/L	0.63 (0.10,1.15)*	0.02	0.63	0.1	1.15
ALP, U/L	0.00 (-0.00,0.00)	0.676	0	0	0
RF, rheumatoid factor; ANA, anti-nuclear antibody; IL, interleukin; IFN, interferon; TNF, tumor necrosis factor; Ca, calcium; P, phosphorus; ALP, alkaline phosphatase.
