# Supplementary material for: Subtype-specific profiles and predictive factors for early evaluation of vitamin D levels in newly diagnosed active juvenile idiopathic arthritis
Source: Research Square preprint supplement (doi:10.21203/rs.3.rs-5659951/v1), 2025-05-06
Supplement: Supplementary file 5 [file e18512498033ebb4b703d1f3.xlsx]

## Sheet: Sheet1
Table 3. Multivariable analysis of the association between vitamin D and JIA
Predictors	Model 1		Model 2		Model 3		Model 4		Model 5
	Estimate beta (95% CI)	p-value	Estimate beta (95% CI)	p-value	Estimate beta (95% CI)	p-value	Estimate beta (95% CI)	p-value	Estimate beta (95% CI)	p-value
JIA subgroups
Enthesitis-related arthritis vs Systemic JIA	0.14 (-0.39,0.71)	0.62	0.50 (-0.02,1.06)	0.066	0.49 (-0.03,1.05 )	0.073	0.68 (0.05,1.34)*	0.036	0.66 (0.03,1.31)*	0.042
Oligoarticular JIA vs Systemic JIA	0.68 (0.10,1.29)*	0.025	0.51 (-0.06,1.10)	0.084	0.61 (0.04,1.20)*	0.038	0.76 (0.08,1.46)*	0.029	0.69 (0.02,1.38)*	0.045
Rheumatoid factor-negative JIA vs Systemic JIA	0.53 (-0.02,1.11)	0.066	0.68 (0.15,1.24)*	0.014	0.66 (0.14,1.22)*	0.016	0.82 (0.21,1.47)*	0.01	0.70 (0.10,1.32)*	0.025
Rheumatoid factor-positive JIA vs Systemic JIA	0.08 (-0.55,0.73)	0.8	0.28 (-0.34,0.91)	0.387	0.23 (-0.39,0.87)	0.466	0.44 (-0.47,1.32)	0.334	0.38 (-0.50,1.24)	0.39
Undifferentiated JIA vs Systemic JIA	0.75 (0.24,1.31)*	0.005	0.75 (0.26,1.28)*	0.004	0.74 (0.25,1.28)*	0.004	0.88 (0.28,1.51)*	0.004	0.77 (0.19,1.39)*	0.011
Age (years)			-0.09 (-0.12,-0.06)*	<0.001	-0.04 (-0.13,0.04)	0.288	-0.05 (-0.14,0.03)	0.237	-0.01 (-0.10,0.08)	0.741
Gender
Male vs Female			0.03 (-0.23,0.29)	0.842	0.01 (-0.25,0.27)	0.957	-0.01 (-0.29,0.26)	0.932	0.09 (-0.19,0.36)	0.549
Weight_3f
Below normal vs Normal					-0.03 (-0.49,0.40)	0.885	-0.04 (-0.51,0.41)	0.861	-0.05 (-0.51,0.40)	0.835
Above normal vs Normal					-0.33 (-1.00,0.31)	0.326	-0.41 (-1.08,0.23)	0.222	-0.59 (-1.29,0.05)	0.081
BSA (m2)					-0.48 (-1.46,0.48)	0.332	-0.54 (-1.57,0.47)	0.293	-0.92 (-2.00,0.12)	0.077
Anti-CCP
Positive vs Negative							-0.14 (-0.88,0.62)	0.715	-0.19 (-0.91,0.54)	0.596
ANA
Positive vs Negative							-0.04 (-0.34,0.26)	0.801	-0.03 (-0.33,0.26)	0.851
Normalized ESR (mm/1hr)							-0.07 (-0.14,0.00)	0.058	-0.08 (-0.15,-0.01)*	0.025
Normalized CRP (mg/L)							0.09 (-0.00,0.17)	0.05	0.09 (-0.00,0.17)*	0.045
Ca (pg/ml)									0.31 (-0.55,1.09)	0.428
P (mmol/L)									0.10 (-0.47,0.65)	0.734
ALP (mmol/L)									-0.00 (-0.00,0.00)	0.771
BMD
Decrease vs Normal									-0.53 (-0.83,-0.24)*	<0.001
* The differences were significant. JIA, juvenile idiopathic arthritis; RF, rheumatoid factor; anti-CCP, anti-cyclic citrullinated antibody; ANA, anti-nuclear antibody; ESR, erythrocyte sedimentation rate; CRP, C-reactive protein; Ca, calcium; P, phosphorus; ALP, alkaline phosphatase; BMD, bone mineral density; kg, kilogram; 3f means three classification of body weight.
