# Supplementary material for: Subtype-specific profiles and predictive factors for early evaluation of vitamin D levels in newly diagnosed active juvenile idiopathic arthritis
Source: Research Square preprint supplement (doi:10.21203/rs.3.rs-5659951/v1), 2025-05-06
Supplement: Supplementary file 6 [file e806319a9975f8ab23d7b0e3.xlsx]

## Sheet: Sheet1
Supplementary Table 2. Interaction between between JIA diagnosis and three variables
Interaction variables		p-value
Gender	Enthesitis-related arthritis vs Systemic JIA	0.532
	Oligoarticular JIA vs Systemic JIA	0.020*
	Rheumatoid factor-negative JIA vs Systemic JIA	0.214
	Rheumatoid factor-positive JIA vs Systemic JIA	0.496
	Undifferentiated JIA vs Systemic JIA	0.105
		Below	Above
Weight	Enthesitis-related arthritis vs Systemic JIA	0.297	<0.001*
	Oligoarticular JIA vs Systemic JIA	0.28	<0.001*
	Rheumatoid factor-negative JIA vs Systemic JIA	0.578	-
	Rheumatoid factor-positive JIA vs Systemic JIA	0.615	-
	Undifferentiated JIA vs Systemic JIA	0.372	0.001*
BMD	Enthesitis-related arthritis vs Systemic JIA	0.49
	Oligoarticular JIA vs Systemic JIA	0.939
	Rheumatoid factor-negative JIA vs Systemic JIA	0.56
	Rheumatoid factor-positive JIA vs Systemic JIA	0.751
	Undifferentiated JIA vs Systemic JIA	0.694
* The p-value in different model was < 0.001. JIA, juvenile idiopathic arthritis; BMD, bone mineral density.
