# Supplementary figures and images for: Subtype-specific profiles and predictive factors for early evaluation of vitamin D levels in newly diagnosed active juvenile idiopathic arthritis
Source: Research Square preprint supplement (doi:10.21203/rs.3.rs-5659951/v1), 2025-05-06

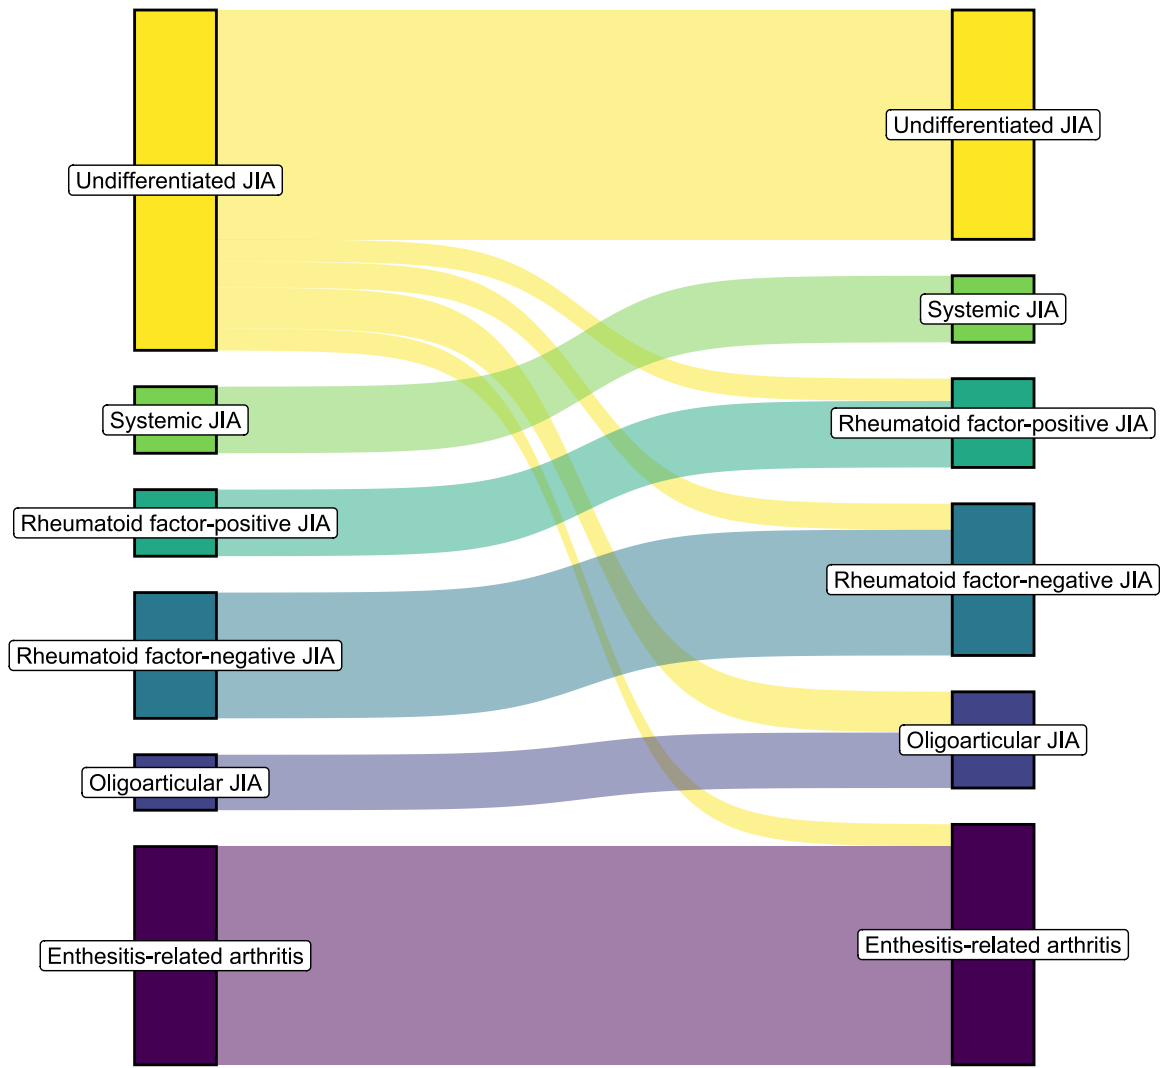

Initial diagnosis

Diagnosis According to ILAR criteria

Diagnosis

Supplement: Supplementary file 1 [file d595fea6babcf722b4001cb3.pdf]
